# Supplementary material for: Postpartum depression and health-related quality of life: a Saudi Arabian perspective
Source: PeerJ journal article supplement (doi:10.7717/peerj.14240), 2022-10-14
Supplement: Arabic-EPDS.pdf [file Arabic-EPDS.pdf]

|                                                  |             |
|--------------------------------------------------|-------------|
| FAMILY NAME                                      | MRN         |
| GIVEN NAME                                       | MALE FEMALE |
| D.O.B: / /                                       | M.O.        |
| ADDRESS:                                         |             |
| LOCATION:                                        |             |
| COMPLETE ALL DETAILS OR AFFIX PATIENT LABEL HERE |             |

**Facility:**
**The Edinburgh Postnatal Depression Scale**

Cox JL, Holden JM Sagovsky R (1987) Detection of postnatal depression: development of the 10-item Edinburgh postnatal depression scale. Brit J Psychiatry 150 782-86. Reproduced with permission

بما أنك أنجبت طفلاً مؤخرًا، نود أن نعرف شعورك الآن. يرجى وضع علامة في خانة الإجابة التي تعبر بشكل أفضل عما شعرت به في الأيام السبعة الماضية، وليس فقط عما تشعرين به اليوم. إليك هذا المثال للتوضيح.

**شعرت بأنني سعيدة**

- نعم، في جميع الأوقات  
 نعم، في معظم الأوقات  
 كلا، ليس كثيراً  
 كلا، أبداً

وهذا يعني: "شعرت بأنني سعيدة معظم الوقت خلال الأسبوع الماضي". نرجو منك أن تكلمي الأسئلة الأخرى بالطريقة ذاتها.

1. استطعت الشعور بالفرح والسعادة: 6. تراكمت الأعمال عليّ فلم أستطع القيام بها كلها:

- بالمقدار نفسه الذي استطعته من قبل  
 ليس تماماً بالمقدار نفسه الآن  
 ليس بالمقدار نفسه الآن  
 كلا مطلقاً
- نعم، في معظم الأحيان لم أستطع القيام بها أبداً  
 نعم، في بعض الأحيان لم أستطع القيام بها كالمعتاد  
 كلا، لقد استطعت القيام بها في بعض الأحيان  
 كلا، لقد استطعت القيام بها كالمعتاد

2. تطلعت إلى الأمور بتشوق: 7. كنت تعيسة لدرجة أنني واجهت صعوبة في النوم:

- بالمقدار نفسه مثل أي وقت مضى  
 أقل نوعاً ما مما اعتدته  
 أقل بكثير مما اعتدته  
 نادراً
- نعم، في معظم الأحيان  
 نعم، في بعض الأحيان  
 كلا، ليس كثيراً  
 كلا، أبداً

3. لمت نفسي بدون لزوم عندما سارت الأمور على غير ما يرام: 8. شعرت بأنني تعيسة وبانسة:

- نعم، في معظم الأحيان  
 نعم، في بعض الأحيان  
 ليس في أحوال كثيرة  
 كلا، أبداً
- نعم، في معظم الأحيان  
 نعم، في أحيان كثيرة  
 ليس كثيراً  
 كلا، مطلقاً

4. كنت قلقة ومشغولة البال بدون سبب وجيه: 9. شعرت بالتعاسة لدرجة البكاء:

- كلا، أبداً  
 نادراً  
 نعم، في بعض الأحيان  
 نعم، في كثير من الأحيان
- نعم، في معظم الأحيان  
 نعم، في كثير من الأحيان  
 من وقت لآخر فقط  
 كلا، مطلقاً

5. شعرت بالخوف والذعر بدون سبب وجيه: 10. خطرت لي فكرة إلحاق الأذى بنفسني:

- نعم، كثيراً في كثير من الأحيان  
 نعم، في بعض الأحيان  
 كلا، ليس كثيراً  
 كلا، مطلقاً
- نعم، في أحيان كثيرة  
 أحياناً  
 نادراً  
 كلا، مطلقاً

Date Completed: \_\_\_\_\_ Total Score: \_\_\_\_\_ / 30 Total Score for Question 10: \_\_\_\_ / 3
