# Supplementary material for: Postpartum depression and health-related quality of life: a Saudi Arabian perspective
Source: PeerJ. 2022 Oct 14;10:e14240. doi: 10.7717/peerj.14240 (PMC9575671; doi:10.7717/peerj.14240)
Supplement: Supplemental Information 1 [file peerj-10-14240-s001.xlsx]

## Sheet: Sheet1
Age	age range	Educational level	education range	Employment status	Income	Income range	Marital status	Desire for pregnancy	Mode of delivery	Number of deliveries	Deliveries range	Depression history	Breast feeding	Contraceptive Use	History of stress	Postpartum phase	History of abortion	Smoking during pregnacy	Preterm delivery	Status of stillbirth	Good neonatal health	Family support	Voilence from spouse	Nationality	Location	location range	Months from delivery time	I have been able to laugh and see the funny side of things I have felt happy	I have looked forward with enjoyment to things	. I have blamed myself unnecessarily when things went wrong	I have been anxious or worried for no good reason	I have felt scared or panicky for no very good reason	Things have been getting on top of me	I have been so unhappy that I have had difficulty sleeping	. I have felt sad or miserable:	I have been so unhappy that I have been crying:	The thought of harming myself has occurred to me	SUM	Depression-categorical	depression-Numerical	1) In general, would you say your health is:	Moderate activities such as moving a table, pushing a vacuum cleaner, bowling, or playing golf.	Climbing several flights of stairs.	Accomplished less than you would like.	Were limited in the kind of work or other activities	Accomplished less than you would like.	Did work or activities less carefully than usual	During the past 4 weeks, how much did pain interfere with your normal work (including work outside the home and housework)?	Have you felt calm & peaceful?
32	1	3	0	0	2	1	1	0	1	3	1	1	0	1	1	0	0	0	0	0	1	0	0	1	0	0	2	2	1	0	2	1	0	2	3	3	1	15	1	2	Excellent	YES limited a lot,	NO, not limited at all	NO	YES	YES	YES	Quite a bit	Most of the time
33	1	4	1	1	0	0	1	1	1	4	1	1	0	0	1	0	0	0	0	0	1	0	1	0	3	1	1	1	1	3	2	3	2	2	2	3	3	22	1	2	Excellent	Yes limited a little	Yes limited a little	YES	YES	YES	YES	Quite a bit	A good bit of the time
42	1	4	1	0	2	1	1	0	1	2	0	0	1	0	1	1	0	0	0	0	1	1	0	1	0	0	2	1	1	0	1	2	2	1	1	1	0	10	0	1	Excellent	Yes limited a little	Yes limited a little	YES	YES	NO	YES	Quite a bit	Most of the time
33	1	4	1	1	2	1	1	0	1	3	1	1	1	0	1	1	1	1	0	0	1	1	0	0	0	0	1	2	2	2	2	2	1	1	1	1	2	16	1	2	Excellent	YES limited a lot,	YES limited a lot,	YES	YES	YES	YES	Quite a bit	Most of the time
25	0	3	0	0	1	0	1	0	1	4	1	0	1	1	1	1	0	0	0	0	1	1	0	0	0	0	1	2	3	3	3	2	1	1	2	1	0	18	1	2	Very good	YES limited a lot,	YES limited a lot,	YES	YES	YES	YES	Moderately	A little of the time
28	0	3	0	0	1	0	1	1	1	2	0	0	1	0	1	0	0	0	0	0	1	1	0	1	0	0	1	1	1	1	1	2	1	2	1	1	0	11	0	1	Good	Yes limited a little	YES limited a lot,	NO	NO	YES	YES	Moderately	Most of the time
29	0	4	1	1	2	1	1	0	0	5	1	1	0	0	0	1	1	1	1	0	1	1	0	0	2	1	2	1	1	1	2	3	2	2	2	2	2	18	1	2	Good	NO, not limited at all	Yes limited a little	YES	YES	YES	YES	Moderately	A good bit of the time
33	1	3	0	0	2	1	1	1	0	1	0	0	1	1	1	1	0	0	0	0	1	1	0	0	2	1	2	1	2	1	2	1	1	2	1	1	2	14	1	2	Very good	YES limited a lot,	Yes limited a little	YES	YES	YES	NO	Quite a bit	Most of the time
29	0	4	1	1	2	1	1	1	1	3	1	0	1	0	0	1	0	0	0	0	1	1	0	1	0	0	1	3	1	3	2	1	2	1	2	1	1	17	1	2	Excellent	NO, not limited at all	NO, not limited at all	NO	YES	NO	NO	Quite a bit	Most of the time
28	0	4	1	1	2	1	1	1	1	4	1	0	1	1	1	0	0	0	0	0	1	1	0	0	2	1	2	1	1	2	2	2	2	2	2	2	2	18	1	2	Very good	Yes limited a little	Yes limited a little	NO	NO	NO	NO	Quite a bit	A good bit of the time
43	1	2	0	1	0	0	0	0	0	3	1	0	0	1	0	0	1	1	1	1	1	0	0	0	0	0	0	2	1	1	1	2	1	1	2	2	2	15	1	2	Very good	Yes limited a little	Yes limited a little	YES	NO	YES	YES	Quite a bit	Most of the time
40	1	4	1	1	2	1	1	1	1	7	1	0	1	0	0	1	0	0	0	0	1	1	0	0	2	1	2	0	1	2	2	1	1	1	1	1	0	10	0	1	Excellent	NO, not limited at all	NO, not limited at all	NO	NO	NO	NO	Not at all	All of The time
33	1	3	0	0	2	1	1	1	1	2	0	0	1	1	1	1	0	0	0	0	1	0	0	1	0	0	2	1	2	1	1	1	1	1	0	0	0	8	0	0	Poor	Yes limited a little	YES limited a lot,	NO	NO	NO	YES	Extremely	A little of the time
30	0	3	0	0	2	1	1	1	1	3	1	0	1	0	0	0	0	0	1	0	1	1	0	1	0	0	0	0	0	0	0	1	1	1	0	1	1	5	0	0	Excellent	Yes limited a little	YES limited a lot,	NO	YES	YES	NO	Quite a bit	Most of the time
34	1	4	1	1	2	1	1	1	0	1	0	0	1	0	0	0	0	1	0	0	1	1	0	1	0	0	0	2	2	0	3	2	1	0	3	2	0	15	1	2	Good	YES limited a lot,	NO, not limited at all	YES	YES	YES	YES	Extremely	None of the time
30	0	4	1	1	1	0	1	0	1	1	0	0	1	0	1	1	0	1	0	0	1	1	0	1	0	0	2	1	1	1	2	2	2	2	2	1	0	14	1	2	Very good	YES limited a lot,	Yes limited a little	YES	YES	YES	NO	Moderately	Most of the time
38	1	4	1	1	2	1	1	1	0	5	1	0	1	0	1	0	1	0	0	1	1	1	0	1	0	0	1	1	0	1	2	2	2	2	0	1	0	11	0	1	Very good	NO, not limited at all	NO, not limited at all	YES	YES	YES	YES	Quite a bit	Most of the time
27	0	3	0	0	1	0	1	1	0	4	1	0	1	0	0	1	0	0	1	0	1	1	0	1	0	0	1	3	1	2	2	1	2	2	2	1	1	17	1	2	Very good	NO, not limited at all	NO, not limited at all	YES	YES	YES	YES	Moderately	Most of the time
23	0	4	1	0	2	1	1	0	1	2	0	0	1	1	1	0	0	0	0	0	1	1	0	1	0	0	0	0	0	0	1	0	1	0	0	0	0	2	0	0	Good	YES limited a lot,	NO, not limited at all	YES	YES	YES	YES	Extremely	None of the time
33	1	4	1	1	2	1	1	1	1	4	1	0	1	1	0	1	0	0	0	0	1	1	0	1	0	0	2	0	1	2	2	1	2	1	1	0	0	10	0	1	Very good	NO, not limited at all	NO, not limited at all	YES	YES	YES	YES	Quite a bit	Most of the time
39	1	3	0	0	0	0	1	0	0	6	1	0	0	1	1	1	0	0	0	0	1	1	0	1	0	0	2	0	0	2	2	3	3	3	2	3	0	18	1	2	Good	YES limited a lot,	NO, not limited at all	YES	YES	YES	YES	Extremely	None of the time
33	1	4	1	1	2	1	1	1	1	3	1	0	1	1	1	1	1	0	0	1	1	1	0	1	0	0	2	0	0	0	1	0	1	0	0	0	0	2	0	0	Fair	NO, not limited at all	Yes limited a little	YES	NO	NO	NO	Moderately	A good bit of the time
23	0	3	0	0	2	1	1	1	1	2	0	1	0	1	1	1	0	0	0	0	1	1	0	1	0	0	2	2	1	3	2	2	3	2	1	2	2	20	1	2	Very good	NO, not limited at all	NO, not limited at all	NO	NO	NO	NO	Moderately	All of The time
26	0	3	0	0	2	1	1	1	1	4	1	0	1	1	0	1	0	0	0	0	1	1	0	1	الجبيل	1	2	0	0	0	1	1	2	0	1	1	0	6	0	0	Very good	YES limited a lot,	NO, not limited at all	YES	YES	YES	YES	Extremely	Most of the time
29	0	4	1	0	1	0	1	0	1	3	1	0	1	1	1	0	0	0	0	0	1	1	0	0	0	0	0	1	0	3	3	3	2	3	1	3	0	19	1	2	Very good	NO, not limited at all	NO, not limited at all	YES	YES	YES	YES	Moderately	Most of the time
36	1	3	0	0	2	1	1	1	1	3	1	0	0	1	1	0	1	0	0	0	1	1	0	1	0	0	2	0	1	2	1	1	1	3	1	1	0	11	0	1	Very good	NO, not limited at all	NO, not limited at all	NO	NO	NO	NO	Moderately	All of The time
33	1	4	1	1	2	1	1	1	0	3	1	0	1	0	1	0	0	0	1	0	1	1	0	1	0	0	2	0	1	1	1	1	2	0	0	0	0	6	0	0	Good	Yes limited a little	Yes limited a little	YES	YES	YES	YES	Quite a bit	Most of the time
27	0	4	1	1	1	0	1	1	1	1	0	0	1	1	1	1	1	0	0	0	1	1	0	1	0	0	1	1	0	1	2	0	1	0	0	0	0	5	0	0	Very good	YES limited a lot,	NO, not limited at all	YES	YES	YES	YES	Extremely	Most of the time
29	0	4	1	0	1	0	1	0	1	3	1	0	1	1	1	0	0	0	0	0	1	1	0	0	0	0	0	1	0	3	3	3	2	3	1	3	0	19	1	2	Excellent	YES limited a lot,	NO, not limited at all	NO	NO	NO	NO	Quite a bit	Most of the time
33	1	4	1	1	2	1	1	1	0	3	1	0	1	0	1	0	0	0	1	0	1	1	0	1	0	0	2	0	1	1	1	1	2	0	0	0	0	6	0	0	Good	Yes limited a little	Yes limited a little	YES	YES	YES	NO	Moderately	Most of the time,
29	0	4	1	0	1	0	1	0	1	3	1	0	1	1	1	0	0	0	0	0	1	1	0	0	0	0	0	1	0	3	3	3	2	3	1	3	0	19	1	2	Good	YES limited a lot,	YES limited a lot,	YES	NO	NO	NO	Quite a bit	Most of the time
40	1	4	1	1	2	1	1	1	1	7	1	1	0	0	1	1	1	0	1	0	1	1	0	1	0	0	2	0	0	1	3	2	2	2	1	0	0	11	0	1	Good	Yes limited a little	Yes limited a little	YES	YES	YES	NO	Moderately	Most of the time,
26	0	4	1	0	0	0	1	1	0	1	0	0	0	0	1	0	0	0	0	0	1	1	0	1	0	0	2	0	2	0	2	0	2	2	0	0	0	8	0	0	Good	YES limited a lot,	YES limited a lot,	YES	NO	NO	NO	Moderately	A good bit of the time
35	1	4	1	0	1	0	1	1	1	1	0	0	1	0	1	0	0	0	1	0	1	1	0	1	0	0	0	0	0	0	0	2	2	0	0	0	0	4	0	0	Very good	Yes limited a little	Yes limited a little	YES	YES	YES	YES	Quite a bit	A good bit of the time
27	0	4	1	1	1	0	1	1	1	1	0	0	1	1	1	1	1	0	0	0	1	1	0	1	0	0	1	1	0	1	2	0	1	0	0	0	0	5	0	0	Very good	Yes limited a little	Yes limited a little	YES	YES	YES	YES	Quite a bit	A good bit of the time
26	0	4	1	0	0	0	1	1	0	1	0	0	0	0	1	0	0	0	0	0	1	1	0	1	0	0	2	0	2	0	2	0	2	2	0	0	0	8	0	0	Excellent	Yes limited a little	Yes limited a little	YES	YES	YES	YES	Moderately	A good bit of the time
33	1	4	1	1	2	1	1	0	1	3	1	0	1	0	0	1	0	0	0	0	1	1	0	1	0	0	1	1	1	1	2	2	2	2	2	2	0	15	1	2	Very good	YES limited a lot,	YES limited a lot,	YES	YES	YES	YES	Moderately	A little of the time
35	1	4	1	0	1	0	1	1	1	1	0	0	1	0	1	0	0	0	1	0	1	1	0	1	0	0	0	0	0	0	0	2	2	0	0	0	0	4	0	0	Excellent	NO, not limited at all	Yes limited a little	YES	YES	YES	YES	Moderately	A little of the time
32	1	3	0	0	2	1	1	1	1	4	1	0	0	1	0	1	0	0	0	0	1	1	0	1	0	0	2	0	0	3	1	2	2	1	1	0	0	10	0	1	Excellent	Yes limited a little	NO, not limited at all	YES	NO	NO	YES	Extremely	Most of the time
30	1	4	1	1	1	0	1	1	1	2	0	0	1	1	1	1	0	0	1	0	1	1	0	1	0	0	2	1	1	2	2	2	1	2	1	1	0	13	1	2	Very good	NO, not limited at all	NO, not limited at all	YES	NO	YES	YES	Quite a bit	Most of the time
43	1	4	1	0	2	1	1	0	1	3	1	0	0	0	1	0	0	0	0	0	1	1	0	1	2	1	2	1	0	3	2	2	3	3	2	1	0	17	1	2	Excellent	YES limited a lot,	NO, not limited at all	NO	NO	NO	NO	Quite a bit	Most of the time
30	0	4	1	1	1	0	1	1	1	2	0	0	1	1	1	1	0	0	1	0	1	1	0	1	0	0	2	1	1	2	2	2	1	2	1	1	0	13	1	2	Very good	Yes limited a little	Yes limited a little	YES	YES	YES	YES	Moderately	A good bit of the time
37	1	4	1	1	2	1	1	1	1	6	1	0	0	1	1	1	0	0	0	0	1	1	0	1	0	0	2	1	3	1	2	0	0	1	1	0	0	9	0	0	Excellent	YES limited a lot,	Yes limited a little	YES	YES	NO	NO	Extremely	Most of the time
24	0	4	1	1	2	1	1	1	1	2	0	0	1	0	0	1	0	0	0	0	1	1	0	1	0	0	1	1	1	2	2	2	2	2	1	3	0	16	1	2	Excellent	NO, not limited at all	NO, not limited at all	YES	YES	NO	NO	Quite a bit	All of The time
40	1	4	1	1	2	1	1	1	1	6	1	0	1	0	0	0	0	0	0	0	1	1	0	1	0	0	2	1	1	2	2	2	2	2	2	1	0	15	1	2	Very good	Yes limited a little	Yes limited a little	NO	NO	NO	NO	Moderately	All of The time
38	1	4	1	1	2	1	1	1	1	6	1	0	1	0	1	1	0	0	0	0	1	1	0	0	0	0	2	1	1	2	2	1	2	2	1	1	0	13	1	2	Good	Yes limited a little	Yes limited a little	YES	YES	YES	YES	Quite a bit	A good bit of the time
34	1	4	1	1	2	1	1	1	0	1	0	0	1	0	0	0	0	1	0	0	1	1	0	1	0	0	0	2	2	0	3	2	1	0	3	2	0	15	1	2	Very good	NO, not limited at all	NO, not limited at all	NO	NO	YES	YES	Moderately	A good bit of the time
26	0	4	1	0	2	1	1	1	1	1	0	0	1	0	1	0	0	0	0	0	1	0	0	1	3	1	2	1	2	2	2	2	3	2	3	3	1	21	1	2	Excellent	NO, not limited at all	NO, not limited at all	YES	YES	YES	YES	Not at all	Most of the time
24	0	0	0	0	0	0	1	0	1	1	0	0	0	0	0	1	0	0	0	0	1	1	0	1	0	0	2	3	3	1	2	3	3	1	1	0	1	18	1	2	Very good	Yes limited a little	Yes limited a little	YES	YES	YES	YES	Not at all	A little of the time
31	1	3	0	0	0	0	1	1	0	3	1	0	1	0	1	1	0	0	0	0	1	1	0	1	0	0	2	1	1	1	3	2	2	1	1	1	1	14	1	2	Good	YES limited a lot,	YES limited a lot,	NO	NO	YES	YES	Not at all	A good bit of the time
23	0	3	0	0	0	0	1	0	0	1	0	0	0	1	0	1	1	0	0	0	1	1	0	1	0	0	2	0	0	2	0	1	0	2	0	0	0	5	0	0	Good	Yes limited a little	Yes limited a little	YES	YES	YES	YES	Moderately	All of The time
37	1	4	1	1	2	1	1	1	0	3	1	0	1	0	0	1	0	0	0	0	1	1	0	0	0	0	1	1	1	2	2	2	2	2	1	1	0	14	1	2	Excellent	YES limited a lot,	Yes limited a little	YES	YES	NO	YES	Not at all	All of The time
32	1	4	1	1	2	1	1	1	0	2	0	0	1	0	0	1	0	0	0	0	1	1	0	1	0	0	0	1	1	1	2	1	2	1	1	1	0	11	0	1	Excellent	NO, not limited at all	YES limited a lot,	YES	NO	NO	NO	Quite a bit	A good bit of the time
24	0	3	0	1	1	0	1	1	1	2	0	0	1	1	1	1	0	0	0	0	1	1	0	1	3	1	2	0	0	1	2	1	0	0	0	0	0	4	0	0	Excellent	Yes limited a little	Yes limited a little	YES	YES	YES	YES	Quite a bit	A little of the time
29	0	2	0	0	2	1	1	1	1	3	1	0	1	1	0	1	0	0	0	0	1	1	0	1	0	0	2	0	0	2	2	2	2	1	1	3	2	15	1	2	Excellent	YES limited a lot,	YES limited a lot,	NO	NO	NO	NO	Not at all	All of The time
38	1	4	1	1	2	1	1	1	1	5	1	0	1	0	0	1	0	0	0	0	1	1	0	1	0	0	2	1	2	1	3	2	2	2	1	1	0	15	1	2	Excellent	YES limited a lot,	YES limited a lot,	NO	YES	NO	NO	Not at all	All of The time
30	0	3	0	0	0	0	1	0	1	7	1	0	0	1	1	0	0	0	0	0	1	0	0	1	الخرج	1	1	1	0	2	2	2	2	2	1	1	0	13	1	2	Good	Yes limited a little	NO, not limited at all	NO	YES	YES	YES	Quite a bit	A good bit of the time
25	0	4	1	0	1	0	1	1	1	1	0	0	1	1	1	0	0	0	0	0	1	1	0	1	0	0	1	0	0	2	2	2	1	2	1	1	0	11	0	1	Excellent	YES limited a lot,	YES limited a lot,	YES	NO	NO	NO	Quite a bit	A little of the time
29	0	3	0	0	0	0	1	1	1	4	1	0	1	1	1	1	1	0	0	0	1	1	0	1	0	0	1	1	1	2	3	2	1	2	1	3	0	16	1	2	Excellent	NO, not limited at all	NO, not limited at all	NO	NO	NO	NO	Not at all	A little of the time
27	0	4	1	0	1	0	1	1	1	1	0	0	1	0	1	1	0	0	0	0	1	1	0	0	مكة	1	1	1	1	3	2	1	2	0	1	0	0	11	0	1	Very good	Yes limited a little	Yes limited a little	NO	NO	NO	NO	Quite a bit	Most of the time
44	1	3	0	0	0	0	1	1	1	5	1	0	1	1	1	0	0	0	0	0	1	1	0	1	2	1	0	1	0	3	2	2	2	2	1	2	0	15	1	2	Excellent	YES limited a lot,	YES limited a lot,	NO	NO	NO	NO	Quite a bit	All of The time
24	0	3	0	0	1	0	1	1	1	1	0	0	1	1	0	1	0	0	0	0	1	1	0	1	0	0	1	0	0	0	1	3	2	1	0	0	0	7	0	0	Very good	Yes limited a little	YES limited a lot,	NO	YES	NO	NO	Quite a bit	Most of the time
23	0	3	0	0	1	0	1	1	1	2	0	0	1	0	0	0	0	0	0	0	1	0	0	1	0	0	0	1	0	3	3	2	2	2	1	1	0	15	1	2	Excellent	NO, not limited at all	NO, not limited at all	NO	NO	NO	YES	Moderately	A little of the time
21	0	4	1	0	0	0	1	1	1	1	0	0	1	1	1	1	0	0	0	0	1	1	0	1	0	0	2	2	3	3	3	2	3	3	3	2	1	25	1	2	Good	Yes limited a little	Yes limited a little	YES	YES	NO	NO	Quite a bit	A good bit of the time
34	1	4	1	1	2	1	1	1	0	2	0	0	0	1	0	1	0	0	0	0	1	1	0	1	0	0	1	0	0	0	0	0	0	0	0	0	0	0	0	0	Very good	Yes limited a little	NO, not limited at all	NO	YES	YES	YES	Quite a bit	Most of the time
32	1	4	1	1	2	1	1	1	0	1	0	0	0	1	1	1	0	0	0	0	1	1	0	1	0	0	2	0	0	1	2	0	1	0	0	0	0	4	0	0	Very good	Yes limited a little	Yes limited a little	NO	NO	NO	YES	Quite a bit	Most of the time
23	0	4	1	0	2	1	1	1	1	1	0	0	0	1	1	1	0	0	0	0	1	1	0	1	0	0	0	1	2	1	2	3	3	2	2	3	0	19	1	2	Very good	Yes limited a little	Yes limited a little	NO	NO	NO	NO	Moderately	All of The time,
22	0	3	0	0	2	1	1	1	1	2	0	0	1	0	0	0	0	0	0	0	1	1	0	1	0	0	1	0	0	2	1	2	2	1	1	1	0	10	0	1	Good	Yes limited a little	Yes limited a little	NO	NO	NO	NO	Moderately	A good bit of the time
45	1	1	0	0	0	0	1	1	1	4	1	0	1	0	0	0	0	0	0	0	1	1	0	1	3	1	2	0	0	0	0	0	0	0	0	0	0	0	0	0	Excellent	Yes limited a little	Yes limited a little	NO	NO	NO	NO	Moderately	All of The time
47	1	1	0	0	1	0	1	1	1	7	1	0	1	1	0	0	0	0	0	0	1	1	0	1	2	1	0	0	0	1	2	1	0	0	0	0	0	4	0	0	Excellent	Yes limited a little	Yes limited a little	NO	NO	NO	NO	Moderately	All of The time
38	1	2	0	0	0	0	1	0	1	6	1	0	1	1	0	1	1	0	0	0	1	1	0	1	المدينه المنوره	1	1	1	0	0	1	0	0	0	0	1	0	3	0	0	Excellent	NO, not limited at all	Yes limited a little	YES	NO	YES	NO	Quite a bit	Most of the time
38	1	4	1	0	0	0	1	1	0	3	1	0	0	1	0	1	0	0	0	0	1	1	0	1	0	0	1	0	0	2	1	1	1	1	0	1	0	7	0	0	Excellent	YES limited a lot,	Yes limited a little	NO	NO	NO	NO	Quite a bit	All of The time
38	1	4	1	1	2	1	1	1	1	3	1	0	1	1	1	0	1	0	1	0	1	1	0	1	0	0	2	3	1	2	2	1	2	3	2	0	0	16	1	2	Excellent	Yes limited a little	NO, not limited at all	NO	YES	NO	YES	Not at all	Most of the time
37	1	4	1	1	2	1	0	0	1	2	0	0	1	1	1	0	1	0	0	0	1	1	0	1	0	0	0	1	0	1	2	2	3	2	2	1	1	15	1	2	Excellent	YES limited a lot,	YES limited a lot,	NO	NO	NO	NO	Quite a bit	All of The time
42	1	3	0	0	2	1	1	0	1	4	1	0	1	1	0	1	0	0	0	0	1	1	0	1	0	0	2	0	0	1	2	0	1	0	0	0	0	4	0	0	Excellent	Yes limited a little	Yes limited a little	YES	NO	YES	NO	Not at all	All of The time
45	1	3	0	0	1	0	1	1	1	5	1	0	1	1	0	0	0	0	0	0	1	1	0	1	2	1	2	0	0	1	1	1	0	0	0	0	0	3	0	0	Good	Yes limited a little	YES limited a lot,	NO	YES	YES	YES	Moderately	A good bit of the time
35	1	3	0	0	1	0	1	1	1	3	1	1	1	0	1	1	0	0	0	0	1	0	0	1	الخرج	1	2	1	1	3	2	3	3	1	1	1	0	16	1	2	Very good	Yes limited a little	Yes limited a little	NO	NO	NO	NO	Quite a bit	Most of the time
30	0	4	1	0	0	0	1	0	1	4	1	0	1	1	0	1	0	0	0	0	1	0	0	1	0	0	1	1	1	2	2	2	1	2	1	0	0	12	0	1	Very good	NO, not limited at all	NO, not limited at all	NO	NO	YES	NO	Not at all	Most of the time
42	1	2	0	0	2	1	1	1	0	7	1	0	1	1	0	0	0	0	0	0	1	1	0	1	0	0	0	0	0	0	0	0	0	0	0	0	0	0	0	0	Poor	Yes limited a little	Yes limited a little	YES	YES	YES	YES	Not at all	A good bit of the time
42	1	2	0	0	2	1	1	1	0	7	1	0	1	1	0	0	0	0	0	0	1	1	0	1	0	0	0	0	0	0	0	0	0	0	0	0	0	0	0	0	Excellent	NO, not limited at all	Yes limited a little	YES	NO	YES	NO	Quite a bit	Most of the time
43	1	4	1	0	2	1	1	0	1	7	1	1	1	1	1	1	1	0	0	0	1	1	0	1	0	0	2	0	1	1	1	2	1	2	1	2	2	13	1	2	Good	Yes limited a little	Yes limited a little	NO	NO	YES	YES	Extremely	A little of the time
42	1	2	0	0	2	1	1	1	0	7	1	0	1	1	0	1	0	0	0	0	1	1	0	1	0	0	0	0	0	0	0	0	0	0	0	0	0	0	0	0	Excellent	NO, not limited at all	NO, not limited at all	YES	YES	NO	NO	Moderately	A good bit of the time
30	0	4	1	1	2	1	1	1	0	1	0	0	1	0	0	0	0	1	0	0	1	1	0	1	1	1	0	0	0	3	3	3	1	3	0	1	0	14	1	2	Very good	Yes limited a little	NO, not limited at all	YES	NO	YES	NO	Quite a bit	A little of the time
38	1	2	0	0	0	0	1	0	1	6	1	0	1	1	0	1	1	0	0	0	1	1	0	1	المدينه المنوره	1	1	1	0	0	1	0	0	0	0	1	0	3	0	0	Very good	Yes limited a little	NO, not limited at all	YES	NO	YES	NO	Quite a bit	A little of the time
33	1	4	1	0	1	0	1	0	1	2	0	0	1	1	0	1	0	0	0	0	1	1	0	1	القنفذه	1	1	1	1	3	2	2	2	2	0	3	0	16	1	2	Very good	NO, not limited at all	NO, not limited at all	YES	YES	YES	YES	Moderately	Most of the time
26	0	4	1	0	1	0	1	0	1	3	1	1	0	1	1	1	0	0	1	0	0	1	0	1	القنفذة	1	2	1	1	2	2	3	2	3	3	3	1	21	1	2	Good	Yes limited a little	Yes limited a little	NO	NO	YES	YES	Extremely	A little of the time
47	1	1	0	0	1	0	1	1	1	7	1	0	1	1	0	0	0	0	0	0	1	1	0	1	2	1	0	0	0	1	2	1	0	0	0	0	0	4	0	0	Poor	Yes limited a little	Yes limited a little	YES	YES	YES	YES	Not at all	A good bit of the time
46	1	4	1	1	2	1	1	1	1	5	1	1	1	1	1	1	0	0	0	0	0	1	0	1	0	0	2	1	3	1	3	3	2	2	3	3	2	23	1	2	Excellent	YES limited a lot,	NO, not limited at all	YES	YES	YES	NO	Not at all	All of The time
33	1	4	1	1	2	1	1	1	1	2	0	0	1	1	1	1	0	0	0	0	1	1	0	1	2	1	2	3	2	2	1	2	3	2	2	1	0	18	1	2	Excellent	YES limited a lot,	YES limited a lot,	YES	YES	YES	YES	Not at all	All of The time
43	1	4	1	0	2	1	1	0	1	7	1	1	1	1	1	1	1	0	0	0	1	1	0	1	0	0	2	0	1	1	1	2	1	2	1	2	2	13	1	2	Excellent	YES limited a lot,	YES limited a lot,	NO	NO	NO	NO	Not at all	All of The time
34	1	4	1	1	1	0	1	1	1	1	0	0	0	0	1	1	0	0	0	0	1	0	0	1	2	1	2	3	3	0	0	0	2	0	2	2	1	13	1	2	Very good	Yes limited a little	Yes limited a little	NO	NO	NO	NO	Moderately	All of The time, Most of the time
31	1	4	1	1	1	0	1	1	1	2	0	0	1	1	1	1	1	0	0	1	1	1	0	1	مكه المكرمه	1	2	0	0	1	0	0	1	1	1	1	0	5	0	0	Very good	YES limited a lot,	YES limited a lot,	YES	YES	NO	YES	Quite a bit	A good bit of the time
38	1	4	1	1	1	0	0	0	0	3	1	0	0	1	1	1	1	0	0	0	1	0	0	1	2	1	1	1	2	3	3	3	3	3	3	0	2	23	1	2	Good	Yes limited a little	Yes limited a little	YES	YES	YES	YES	Moderately	A good bit of the time
38	1	4	1	1	1	0	0	0	0	3	1	0	0	1	1	1	1	0	0	0	1	0	0	1	2	1	1	1	2	3	3	3	3	3	3	0	2	23	1	2	Good	Yes limited a little	Yes limited a little	YES	YES	YES	YES	Moderately	A good bit of the time
23	0	4	1	0	1	0	1	0	1	1	0	0	1	0	0	1	0	0	0	0	1	0	0	1	ا0حساء	1	2	0	0	1	2	1	2	2	1	0	0	9	0	0	Very good	Yes limited a little	Yes limited a little	YES	YES	YES	YES	Moderately	A good bit of the time
34	1	4	1	1	1	0	1	1	1	1	0	0	0	0	1	1	0	0	0	0	1	0	0	1	2	1	2	3	3	0	0	0	2	0	2	2	1	13	1	2	Very good	Yes limited a little	Yes limited a little	YES	NO	YES	YES	Quite a bit	Most of the time
33	1	4	1	1	2	1	1	1	1	2	0	0	1	1	1	1	0	0	0	0	1	1	0	1	2	1	2	3	2	2	1	2	3	2	2	1	0	18	1	2	Very good	Yes limited a little	Yes limited a little	YES	YES	YES	YES	Moderately	A good bit of the time
27	0	4	1	0	2	1	1	1	1	1	0	0	1	1	0	1	0	0	0	0	1	1	0	1	0	0	0	0	0	0	2	2	0	0	0	0	0	4	0	0	Very good	Yes limited a little	Yes limited a little	YES	YES	YES	YES	Moderately	A good bit of the time
42	1	4	1	0	2	1	1	0	0	3	1	0	0	0	1	1	1	0	0	0	1	1	0	1	0	0	2	0	0	3	2	3	2	2	1	1	0	14	1	2	Good	Yes limited a little	NO, not limited at all	NO	YES	NO	YES	Moderately	A good bit of the time
34	1	4	1	1	2	1	1	1	0	2	0	0	0	1	0	1	0	0	0	0	1	1	0	1	0	0	1	0	0	0	0	0	0	0	0	0	0	0	0	0	Fair	YES limited a lot,	Yes limited a little	YES	NO	YES	YES	Moderately	Most of the time, A good bit of the time
35	1	3	0	0	1	0	1	1	1	3	1	1	1	0	1	1	0	0	0	0	1	0	0	1	الخرج	1	2	1	1	3	2	3	3	1	1	1	0	16	1	2	Fair	Yes limited a little	Yes limited a little	YES	NO	NO	YES	Moderately	Most of the time
28	0	3	0	1	2	1	1	1	1	4	1	0	0	0	1	1	0	0	0	0	0	0	0	1	0	0	1	0	1	1	1	2	2	3	3	3	0	16	1	2	Good	Yes limited a little	Yes limited a little	YES	NO	YES	YES	Quite a bit	A good bit of the time
25	0	4	1	1	2	1	1	1	0	2	0	0	1	0	0	0	0	0	0	0	1	1	0	1	0	0	1	1	1	2	2	3	3	2	1	1	0	16	1	2	Very good	Yes limited a little	YES limited a lot,	NO	NO	YES	YES	Moderately	All of The time
37	1	3	0	1	2	1	1	1	1	6	1	0	0	0	0	1	0	0	0	0	1	1	0	1	0	0	2	1	1	1	2	2	3	2	1	2	0	15	1	2	Good	Yes limited a little	Yes limited a little	YES	NO	YES	YES	Quite a bit	A good bit of the time
42	1	4	1	1	2	1	1	1	0	5	1	0	1	0	0	1	0	0	0	0	1	1	0	1	0	0	2	1	1	2	3	2	2	2	1	1	0	15	1	2	Good	Yes limited a little	Yes limited a little	YES	NO	YES	YES	Quite a bit	A good bit of the time
28	0	3	0	1	1	0	1	1	0	1	0	0	0	1	1	1	1	0	0	0	1	1	0	1	0	0	2	1	1	2	1	2	1	2	1	1	0	12	0	1	Good	Yes limited a little	Yes limited a little	YES	NO	YES	NO	Quite a bit	Most of the time
44	1	4	1	1	2	1	1	1	1	6	1	0	1	0	0	1	0	0	0	0	1	1	0	1	0	0	2	1	1	2	2	2	2	2	1	1	0	14	1	2	Excellent	Yes limited a little	YES limited a lot,	YES	YES	YES	YES	Moderately	Most of the time
27	0	4	1	1	2	1	1	1	1	3	1	0	1	0	0	0	0	0	0	0	1	1	0	1	0	0	2	1	1	2	2	2	2	2	1	1	0	14	1	2	Excellent	NO, not limited at all	YES limited a lot,	NO	NO	NO	NO	Quite a bit	Most of the time
22	0	3	0	0	1	0	1	0	1	1	0	0	1	0	1	0	0	1	1	0	1	1	0	1	0	0	0	1	1	1	3	0	3	3	3	3	1	19	1	2	Poor	Yes limited a little	Yes limited a little	YES	YES	YES	YES	Not at all	A good bit of the time
29	0	2	0	1	0	0	1	1	1	3	1	1	0	1	1	1	1	0	1	0	1	0	0	1	0	0	1	0	0	2	2	1	1	2	1	1	2	12	0	1	Poor	NO, not limited at all	NO, not limited at all	YES	YES	YES	YES	Extremely	Most of the time
41	1	4	1	1	2	1	1	0	0	4	1	0	1	0	1	1	0	0	0	1	1	1	1	1	0	0	2	1	1	1	2	1	1	1	2	2	2	14	1	2	Excellent	YES limited a lot,	Yes limited a little	NO	NO	NO	NO	Quite a bit	All of The time
33	1	2	0	0	1	0	1	1	1	5	1	0	1	1	1	1	1	0	1	0	0	0	0	0	0	0	1	0	1	2	2	2	2	2	2	2	2	17	1	2	Excellent	Yes limited a little	Yes limited a little	NO	NO	NO	NO	Moderately	All of The time
30	0	3	0	0	0	0	1	1	0	2	0	0	0	0	1	1	0	0	1	0	1	1	0	0	1	1	0	3	0	0	2	1	3	3	0	1	0	13	1	2	Very good	Yes limited a little	Yes limited a little	YES	YES	YES	YES	Quite a bit	A good bit of the time
33	1	2	0	0	1	0	1	1	1	5	1	0	1	1	1	1	1	0	1	0	0	0	0	0	0	0	1	0	1	2	2	2	2	2	2	2	2	17	1	2	Very good	YES limited a lot,	Yes limited a little	YES	YES	YES	NO	Moderately	Most of the time
33	1	2	0	0	1	0	1	1	1	5	1	0	1	1	1	1	1	0	1	0	0	0	0	0	0	0	1	0	1	2	2	2	2	2	2	2	2	17	1	2	Excellent	NO, not limited at all	NO, not limited at all	NO	YES	NO	NO	Quite a bit	Most of the time
28	0	4	1	0	2	1	1	1	1	2	0	0	1	1	1	1	0	0	1	0	0	1	0	1	0	0	2	1	1	2	2	0	3	0	1	1	0	11	0	1	Very good	Yes limited a little	Yes limited a little	YES	YES	YES	YES	Moderately	Most of the time
27	0	4	1	0	2	1	1	1	1	1	0	0	1	0	0	1	1	0	0	0	1	1	0	1	0	0	1	1	1	2	3	2	3	3	1	3	0	19	1	2	Good	Yes limited a little	Yes limited a little	YES	YES	YES	YES	Moderately	A good bit of the time
32	1	3	0	0	2	1	1	1	0	2	0	1	1	1	1	0	1	0	1	1	1	1	0	1	0	0	0	0	0	1	2	2	1	3	0	0	0	9	0	0	Good	Yes limited a little	Yes limited a little	YES	YES	YES	YES	Moderately	A good bit of the time
33	1	4	1	1	2	1	1	1	1	2	0	0	1	1	1	1	0	0	0	0	1	1	0	1	2	1	2	3	2	2	1	2	3	2	2	1	0	18	1	2	Good	Yes limited a little	Yes limited a little	YES	YES	YES	YES	Moderately	A good bit of the time
29	0	4	1	1	2	1	1	0	0	3	1	0	0	1	1	0	1	1	0	0	1	1	0	1	3	1	0	0	1	3	2	2	2	2	3	1	2	18	1	2	Good	Yes limited a little	Yes limited a little	YES	YES	YES	YES	Moderately	A good bit of the time
42	1	2	0	0	2	1	1	1	0	7	1	0	1	1	0	1	0	0	0	0	1	1	0	1	0	0	0	0	0	0	0	0	0	0	0	0	0	0	0	0	Very good	Yes limited a little	Yes limited a little	YES	YES	YES	YES	Moderately	A good bit of the time
42	1	2	0	0	2	1	1	1	0	7	1	0	1	1	0	0	0	0	0	0	1	1	0	1	0	0	0	0	0	0	0	0	0	0	0	0	0	0	0	0	Good	Yes limited a little	Yes limited a little	YES	YES	YES	YES	Moderately	A good bit of the time
40	1	3	0	0	2	1	1	0	0	6	1	0	1	1	1	1	1	0	0	0	1	1	0	1	0	0	2	0	1	0	2	1	1	1	1	1	0	8	0	0	Very good	Yes limited a little	Yes limited a little	YES	YES	YES	YES	Moderately	A good bit of the time
36	1	3	0	0	2	1	1	1	1	3	1	0	0	1	1	0	1	0	0	0	1	1	0	1	0	0	2	0	1	2	1	1	1	3	1	1	0	11	0	1	Good	Yes limited a little	Yes limited a little	YES	YES	YES	YES	Moderately	A good bit of the time
23	0	4	1	0	2	1	1	0	1	2	0	0	1	1	1	0	0	0	0	0	1	1	0	1	0	0	0	0	0	0	1	0	1	0	0	0	0	2	0	0	Very good	Yes limited a little	Yes limited a little	YES	YES	YES	YES	Moderately	Most of the time
36	1	4	1	1	2	1	1	1	1	4	1	0	1	0	0	1	0	0	0	0	1	1	0	1	ا0حساء	1	2	1	1	2	2	2	3	2	1	1	0	15	1	2	Excellent	Yes limited a little	Yes limited a little	YES	YES	YES	YES	Quite a bit	Most of the time
39	1	3	1	1	1	0	1	1	0	3	1	0	1	0	0	0	0	0	0	0	1	1	0	1	ا0حساء	1	1	1	1	2	2	2	2	2	1	1	0	14	1	2	Good	Yes limited a little	Yes limited a little	YES	YES	YES	YES	Moderately	A good bit of the time
28	0	4	1	1	2	1	1	1	1	2	0	0	1	0	0	0	0	0	1	0	1	1	0	1	ا0حساء	1	1	1	1	1	2	1	2	2	1	1	0	12	0	1	Good	Yes limited a little	Yes limited a little	YES	YES	YES	YES	Moderately	A good bit of the time
33	1	4	1	1	2	1	1	0	1	3	1	0	1	0	0	1	0	0	0	0	1	1	0	1	ا0حساء	1	1	1	1	2	2	2	2	2	2	1	0	15	1	2	Very good	Yes limited a little	Yes limited a little	YES	YES	YES	YES	Moderately	A good bit of the time
31	1	4	1	1	1	0	1	1	0	4	1	0	0	0	0	1	0	0	0	0	1	1	0	1	ا0حساء	1	1	1	1	2	2	2	2	2	1	1	0	14	1	2	Very good	Yes limited a little	Yes limited a little	YES	YES	YES	YES	Moderately	A good bit of the time
27	0	4	1	1	2	1	1	1	1	1	0	0	1	0	0	1	0	0	0	0	1	1	0	1	ا0حساء	1	2	1	1	2	2	2	2	2	1	1	0	14	1	2	Good	Yes limited a little	Yes limited a little	YES	YES	YES	YES	Moderately	A good bit of the time
38	1	4	1	0	1	0	1	1	1	3	1	0	1	0	0	1	0	0	0	0	1	1	0	1	ا0حساء	1	1	1	1	1	2	2	2	2	1	1	0	13	1	2	Very good	Yes limited a little	Yes limited a little	YES	YES	YES	YES	Moderately	A good bit of the time
42	1	4	1	1	2	1	1	1	1	5	1	0	1	0	0	1	0	0	0	0	1	1	0	1	ا0حساء	1	1	1	1	2	2	2	2	3	1	1	0	15	1	2	Excellent	Yes limited a little	Yes limited a little	YES	YES	YES	YES	Moderately	A good bit of the time
32	1	4	1	1	2	1	1	1	1	3	1	0	1	0	0	0	0	0	0	0	1	1	0	1	ا0حساء	1	1	1	1	2	2	2	2	2	1	1	0	14	1	2	Very good	Yes limited a little	Yes limited a little	YES	YES	YES	YES	Quite a bit	A good bit of the time
37	1	4	1	1	2	1	1	0	0	4	1	0	1	0	1	1	0	1	0	0	1	1	0	1	ا0حساء	1	2	1	1	2	2	2	2	2	1	1	0	14	1	2	Very good	Yes limited a little	Yes limited a little	YES	YES	YES	YES	Moderately	A good bit of the time
44	1	4	1	1	2	1	1	1	1	6	1	0	1	0	0	1	0	0	0	0	1	1	0	1	ا0حساء	1	1	1	2	2	2	1	2	3	1	1	0	15	1	2	Very good	Yes limited a little	Yes limited a little	YES	YES	YES	YES	Moderately	A good bit of the time
34	1	4	1	1	2	1	1	1	1	5	1	1	1	0	0	0	0	0	0	0	1	1	0	1	ا0حساء	1	1	1	1	2	2	2	2	3	1	1	0	15	1	2	Very good	Yes limited a little	Yes limited a little	YES	YES	YES	YES	Moderately	A good bit of the time
40	1	4	1	1	2	1	1	1	1	3	1	0	1	0	0	1	0	0	0	0	1	1	0	0	ا0حساء	1	2	1	1	2	2	2	2	2	2	1	0	15	1	2	Very good	Yes limited a little	Yes limited a little	YES	YES	YES	YES	Moderately	A good bit of the time
37	1	3	0	0	1	0	0	1	1	2	0	0	1	0	1	0	0	0	0	0	1	1	0	1	ا0حساء	1	1	1	1	2	2	2	2	2	1	1	0	14	1	2	Very good	YES limited a lot,	YES limited a lot,	NO	NO	YES	YES	Quite a bit	A good bit of the time
33	1	4	1	1	2	1	1	1	1	7	1	0	0	0	0	1	0	0	0	0	1	1	0	1	ا0حساء	1	1	1	1	2	2	1	2	2	2	1	0	14	1	2	Good	Yes limited a little	Yes limited a little	YES	NO	YES	NO	Quite a bit	Most of the time
28	0	3	0	1	2	1	1	1	1	2	0	0	1	0	0	1	1	0	0	1	1	1	0	1	ا0حساء	1	1	1	1	1	2	1	2	3	1	1	0	13	1	2	Very good	YES limited a lot,	Yes limited a little	YES	YES	NO	NO	Quite a bit	Most of the time
44	1	4	1	1	2	1	1	1	1	5	1	0	0	0	0	0	0	0	0	0	1	1	0	1	ا0حساء	1	1	1	1	2	2	2	2	2	1	1	0	14	1	2	Very good	YES limited a lot,	Yes limited a little	YES	NO	NO	NO	Moderately	A good bit of the time,
42	1	3	0	1	2	1	1	1	1	7	1	0	1	0	0	1	0	0	0	0	1	1	0	1	ا0حساء	1	2	1	1	2	2	2	1	2	1	1	0	13	1	2	Excellent	YES limited a lot,	YES limited a lot,	NO	YES	YES	NO	Moderately	All of The time
33	1	4	1	1	2	1	1	1	1	4	1	0	1	0	0	1	0	0	0	0	1	1	0	1	ا0حساء	1	2	1	1	2	2	2	2	2	1	1	0	14	1	2	Very good	Yes limited a little	Yes limited a little	NO	YES	NO	YES	Extremely	All of The time
35	1	4	1	1	2	1	1	1	1	6	1	0	1	0	0	1	0	0	0	0	1	1	0	0	ا0حساء	1	1	1	1	2	2	2	2	2	1	1	0	14	1	2	Excellent	Yes limited a little	Yes limited a little	NO	NO	YES	YES	Quite a bit	All of The time
43	1	4	1	1	2	1	1	1	1	4	1	0	0	0	0	1	0	0	0	0	1	1	0	1	ا0حساء	1	1	1	1	2	2	2	2	2	1	1	0	14	1	2	Very good	NO, not limited at all	Yes limited a little	NO	NO	NO	NO	Not at all	All of The time
44	1	4	1	1	2	1	1	1	1	5	1	0	1	0	0	1	0	0	0	0	1	1	0	1	ا0حساء	1	2	1	1	2	2	2	2	2	1	1	0	14	1	2	Fair	Yes limited a little	YES limited a lot,	YES	YES	YES	YES	Quite a bit	All of The time
26	0	4	1	0	2	1	1	1	1	2	0	0	1	0	0	1	0	0	0	0	1	1	0	1	ا0حساء	1	1	1	1	2	2	2	2	2	1	1	0	14	1	2	Excellent	YES limited a lot,	YES limited a lot,	YES	NO	YES	YES	Not at all	All of The time
24	0	4	1	0	1	0	1	1	1	2	0	0	0	1	0	1	1	0	0	0	1	1	0	1	0	0	1	1	1	2	2	2	2	1	1	1	0	13	1	2	Excellent	Yes limited a little	Yes limited a little	YES	YES	YES	NO	Not at all	All of The time
22	0	4	1	1	1	0	1	1	1	2	0	0	1	0	0	0	1	0	0	0	1	1	0	1	0	0	1	2	0	2	2	2	2	1	3	1	2	17	1	2	Very good	YES limited a lot,	YES limited a lot,	NO	YES	NO	NO	Moderately	Most of the time
25	0	4	1	1	1	0	1	1	1	1	0	0	1	1	0	1	0	0	0	0	1	1	0	1	0	0	2	0	1	1	1	1	1	2	1	1	0	9	0	0	Excellent	NO, not limited at all	Yes limited a little	YES	YES	YES	YES	Extremely	A good bit of the time
30	0	4	1	0	2	1	1	1	1	1	0	0	1	1	0	1	0	0	0	0	1	1	0	1	0	0	1	1	0	0	1	0	1	0	0	0	0	3	0	0	Good	Yes limited a little	Yes limited a little	NO	YES	YES	YES	Moderately	A good bit of the time
23	0	4	1	1	1	0	1	1	1	3	1	0	1	0	1	1	1	0	0	0	1	1	0	1	0	0	1	0	0	3	2	3	0	2	3	3	3	19	1	2	Good	Yes limited a little	Yes limited a little	NO	YES	YES	YES	Moderately	A good bit of the time
34	1	4	1	1	2	1	1	1	1	3	1	1	1	0	1	0	0	0	0	0	1	1	0	1	0	0	0	1	1	2	1	0	1	1	2	2	2	13	1	2	Good	YES limited a lot,	YES limited a lot,	YES	YES	YES	YES	Extremely	A little of the time
29	0	4	1	1	2	1	1	1	1	2	0	0	1	0	0	1	0	0	0	0	1	1	0	1	0	0	1	0	0	2	1	2	2	2	2	3	1	15	1	2	Very good	NO, not limited at all	YES limited a lot,	YES	YES	YES	YES	Extremely	Most of the time
29	0	4	1	1	1	0	1	1	1	1	0	0	1	0	1	0	0	0	0	0	1	1	0	1	0	0	2	0	0	0	1	1	0	0	0	0	0	2	0	0	Very good	NO, not limited at all	NO, not limited at all	NO	NO	NO	NO	Not at all	Most of the time
23	0	4	1	1	2	1	1	1	1	1	0	1	1	0	0	1	0	0	0	0	1	1	0	1	2	1	1	3	1	2	2	2	3	2	3	2	3	23	1	2	Very good	NO, not limited at all	NO, not limited at all	NO	NO	YES	YES	Moderately	A little of the time
20	0	4	1	0	1	0	1	1	1	4	1	1	1	0	1	0	0	0	1	0	1	1	0	1	1	1	1	0	0	3	2	2	3	3	3	3	3	22	1	2	Good	NO, not limited at all	NO, not limited at all	YES	YES	NO	YES	Moderately	A little of the time
40	1	4	1	1	2	1	1	1	1	8	1	0	1	0	1	1	0	0	0	0	1	1	0	1	المجمعة	1	2	0	0	3	2	0	3	2	1	0	0	11	0	1	Excellent	Yes limited a little	YES limited a lot,	YES	YES	YES	NO	Moderately	Most of the time
28	0	4	1	0	2	1	0	1	0	1	0	1	1	0	0	0	0	1	0	0	1	1	1	1	ابها	1	2	0	0	0	0	0	0	0	0	0	0	0	0	0	Fair	Yes limited a little	YES limited a lot,	NO	YES	NO	YES	Extremely	A little of the time
31	1	4	1	0	2	1	1	1	1	4	1	1	1	1	1	0	0	1	1	0	1	1	0	1	1	1	1	0	1	3	3	3	3	3	2	2	2	22	1	2	Excellent	YES limited a lot,	YES limited a lot,	YES	YES	YES	NO	Moderately	A good bit of the time
37	1	4	1	0	0	0	1	1	1	4	1	1	0	0	1	1	0	0	0	0	1	1	0	1	مكه	1	1	1	1	3	2	2	3	1	1	3	1	18	1	2	Very good	Yes limited a little	Yes limited a little	NO	YES	YES	YES	Quite a bit	A good bit of the time
37	1	4	1	0	0	0	1	1	1	4	1	1	0	0	1	1	0	0	0	0	1	1	0	1	مكه	1	1	1	1	3	2	2	3	1	1	3	1	18	1	2	Very good	Yes limited a little	Yes limited a little	NO	YES	YES	YES	Quite a bit	A good bit of the time
32	1	4	1	0	2	1	1	1	0	3	1	1	0	1	1	1	1	1	1	1	1	0	1	1	3	1	2	1	0	2	3	3	3	3	3	3	1	22	1	2	Excellent	NO, not limited at all	NO, not limited at all	NO	NO	NO	NO	Quite a bit	All of The time
20	0	4	1	0	2	1	1	0	0	1	0	0	1	1	0	0	0	0	0	0	1	1	0	1	0	0	0	1	1	2	3	3	2	0	1	3	0	16	1	2	Good	Yes limited a little	Yes limited a little	YES	YES	YES	YES	Moderately	A little of the time
33	1	4	1	0	1	0	1	1	1	3	1	0	1	1	1	1	1	0	0	0	1	1	0	1	0	0	2	0	0	1	1	1	2	0	0	0	0	5	0	0	Excellent	NO, not limited at all	NO, not limited at all	YES	YES	YES	YES	Extremely	None of the time
33	1	4	1	0	0	0	1	1	1	4	1	0	1	1	1	1	0	0	0	0	1	1	0	1	0	0	2	1	1	1	2	2	2	2	2	2	0	15	1	2	Good	Yes limited a little	NO, not limited at all	YES	YES	NO	YES	Quite a bit	Most of the time
33	1	4	1	1	1	0	1	1	1	3	1	0	1	1	1	1	1	0	0	0	1	1	0	1	0	0	0	1	1	2	2	2	2	1	1	2	0	14	1	2	Excellent	NO, not limited at all	NO, not limited at all	YES	YES	YES	YES	Extremely	A little of the time
31	1	4	1	0	2	1	1	1	1	2	0	0	1	0	1	1	0	0	0	0	1	1	0	1	0	0	2	0	1	1	2	1	2	1	1	1	0	10	0	1	Excellent	NO, not limited at all	Yes limited a little	NO	YES	YES	YES	Not at all	A good bit of the time
26	0	4	1	0	1	0	1	0	0	3	1	0	1	1	1	1	0	0	0	0	0	1	0	1	الطائف	1	1	1	1	2	3	2	2	3	2	2	1	19	1	2	Very good	YES limited a lot,	Yes limited a little	NO	NO	YES	NO	Quite a bit	Most of the time
28	0	4	1	0	0	0	1	1	1	2	0	1	1	0	0	0	0	0	0	0	1	1	0	1	3	1	1	0	0	2	2	2	1	1	1	1	0	10	0	1	Excellent	Yes limited a little	YES limited a lot,	YES	YES	YES	YES	Quite a bit	A good bit of the time
25	0	4	1	0	1	0	1	0	1	1	0	1	1	1	1	0	1	1	0	0	1	1	0	1	الحريق	1	1	2	1	1	2	3	3	2	3	2	2	21	1	2	Very good	NO, not limited at all	NO, not limited at all	NO	NO	NO	YES	Moderately	Most of the time
25	0	4	1	0	1	0	1	0	1	1	0	1	1	1	1	0	1	1	0	0	1	1	0	1	الحريق	1	1	2	1	1	2	3	3	2	3	2	2	21	1	2	Excellent	Yes limited a little	YES limited a lot,	YES	YES	YES	YES	Quite a bit	A good bit of the time
30	0	2	1	0	2	1	1	1	1	3	1	0	0	1	1	0	0	0	1	0	1	1	0	1	2	1	1	0	0	2	2	2	0	0	0	0	0	6	0	0	Excellent	YES limited a lot,	YES limited a lot,	YES	YES	NO	NO	Moderately	All of The time
37	1	3	1	0	0	0	1	1	1	5	1	0	1	1	1	1	0	0	1	0	1	1	0	1	القصيم	1	0	2	2	1	3	3	2	3	3	2	2	23	1	2	Good	YES limited a lot,	Yes limited a little	YES	YES	YES	YES	Moderately	A little of the time
28	0	4	1	0	1	0	1	1	0	1	0	0	0	0	1	1	0	1	0	0	1	0	0	1	1	1	2	1	1	0	3	3	3	1	3	3	0	18	1	2	Fair	Yes limited a little	YES limited a lot,	YES	YES	YES	YES	Moderately	A little of the time
23	0	4	1	1	2	1	1	1	1	3	1	1	1	0	1	0	0	0	0	0	1	1	0	1	0	0	2	0	1	2	2	1	2	3	2	1	0	14	1	2	Excellent	Yes limited a little	NO, not limited at all	NO	YES	YES	NO	Moderately	Most of the time
24	0	4	1	0	0	0	1	1	1	1	0	0	1	0	1	0	0	0	0	0	1	0	0	1	1	1	2	2	2	1	3	3	3	3	3	3	1	24	1	2	Very good	Yes limited a little	Yes limited a little	YES	YES	YES	YES	Moderately	A good bit of the time
24	0	4	1	1	1	0	1	1	1	1	0	0	0	1	1	0	0	0	0	0	1	1	0	1	0	0	1	1	0	0	2	0	2	3	3	3	0	14	1	2	Very good	Yes limited a little	Yes limited a little	YES	YES	YES	YES	Quite a bit	All of The time
19	0	3	0	0	0	0	1	1	1	1	0	0	1	1	1	0	0	1	0	0	1	1	1	1	0	0	0	1	0	3	3	3	3	2	1	0	1	17	1	2	Excellent	NO, not limited at all	NO, not limited at all	NO	NO	NO	NO	Not at all	All of The time
29	0	2	0	0	0	0	1	0	0	1	0	1	0	1	1	1	0	0	0	0	1	0	0	1	الطائف	1	2	2	1	3	3	3	3	2	2	3	1	23	1	2	Excellent	NO, not limited at all	NO, not limited at all	YES	YES	NO	NO	Not at all	Most of the time
27	0	4	1	0	1	0	1	1	0	1	0	0	1	1	1	0	0	0	0	0	1	0	0	1	3	1	0	0	1	1	1	1	2	3	1	1	0	11	0	1	Fair	Yes limited a little	NO, not limited at all	YES	YES	YES	YES	Moderately	A good bit of the time
29	0	2	0	0	0	0	1	0	0	1	0	1	0	1	1	1	0	0	0	0	1	0	0	1	الطائف	1	2	2	1	3	3	3	3	2	2	3	1	23	1	2	Excellent	NO, not limited at all	NO, not limited at all	YES	NO	NO	NO	Moderately	All of The time
25	0	3	0	1	1	0	1	1	1	1	0	0	1	1	0	0	0	0	1	0	1	1	0	1	0	0	1	0	0	1	1	0	1	0	0	0	0	3	0	0	Good	Yes limited a little	YES limited a lot,	YES	YES	YES	YES	Extremely	Most of the time
29	0	4	1	1	2	1	1	1	1	1	0	1	0	0	1	0	1	0	0	0	0	1	0	1	0	0	2	2	1	1	2	2	2	2	1	2	2	17	1	2	Excellent	Yes limited a little	Yes limited a little	NO	NO	YES	YES	Quite a bit	All of The time
29	0	4	1	1	1	0	0	1	1	10	1	1	1	1	1	1	1	0	0	0	1	1	0	1	0	0	1	1	2	3	3	3	2	3	3	2	1	23	1	2	Good	YES limited a lot,	Yes limited a little	YES	NO	YES	YES	Not at all	A little of the time
28	0	4	1	1	2	1	1	1	1	2	0	0	1	0	0	0	0	0	0	0	1	1	0	1	0	0	1	0	1	2	1	2	1	2	0	0	0	9	0	0	Good	YES limited a lot,	Yes limited a little	YES	NO	YES	YES	Not at all	A little of the time
37	1	3	0	1	2	1	0	1	0	3	1	1	1	1	1	1	0	1	0	0	1	1	1	0	مكة	1	1	3	0	3	3	2	3	3	1	3	0	21	1	2	Excellent	NO, not limited at all	NO, not limited at all	YES	YES	NO	NO	Moderately	A good bit of the time
33	1	3	0	0	2	1	0	1	1	2	0	0	1	1	1	0	0	1	0	0	1	1	1	1	1	1	1	0	1	2	3	1	0	2	1	2	0	12	0	1	Very good	Yes limited a little	Yes limited a little	YES	YES	YES	YES	Extremely	All of The time
32	1	3	0	0	0	0	1	0	0	4	1	0	1	1	1	0	0	0	0	0	1	1	0	1	خيبر منطقة المديننه المنوره	1	2	0	0	1	1	0	1	0	0	1	0	4	0	0	Good	Yes limited a little	YES limited a lot,	NO	YES	YES	NO	Quite a bit	A little of the time
35	1	3	0	0	0	0	1	1	1	2	0	0	0	0	1	0	0	0	0	0	1	1	0	1	ابها	1	1	0	0	1	1	3	3	1	0	1	0	10	0	1	Very good	YES limited a lot,	YES limited a lot,	NO	YES	NO	NO	Quite a bit	Most of the time
29	0	3	0	0	0	0	1	0	1	2	0	1	0	1	1	1	0	0	0	0	1	1	0	1	2	1	2	0	0	3	2	2	2	3	2	3	0	17	1	2	Excellent	NO, not limited at all	NO, not limited at all	NO	NO	NO	NO	Not at all	None of the time
26	0	4	1	1	2	1	1	0	1	1	0	0	1	1	0	0	0	0	0	0	1	1	0	1	1	1	0	0	1	0	2	3	2	2	1	1	0	12	0	1	Good	YES limited a lot,	YES limited a lot,	YES	NO	YES	NO	Moderately	Most of the time
25	0	3	0	1	0	0	1	1	1	1	0	0	1	0	1	1	0	0	0	0	1	1	0	1	0	0	2	1	1	3	2	2	2	2	2	2	2	19	1	2	Good	YES limited a lot,	YES limited a lot,	YES	NO	YES	NO	Moderately	Most of the time
24	0	4	1	0	0	0	1	1	0	1	0	0	1	0	1	0	1	0	0	0	1	1	0	1	3	1	0	1	0	1	2	2	2	0	0	1	0	9	0	0	Very good	Yes limited a little	Yes limited a little	NO	NO	YES	YES	Quite a bit	All of The time
26	0	4	1	0	0	0	1	1	0	2	0	1	1	1	1	0	1	0	0	0	1	1	0	1	1	1	2	1	0	2	2	2	1	2	2	2	3	17	1	2	Very good	Yes limited a little	Yes limited a little	YES	YES	NO	YES	Quite a bit	All of The time
26	0	4	1	0	0	0	1	1	0	2	0	1	1	1	1	0	1	0	0	0	1	1	0	1	1	1	2	1	0	2	2	2	1	2	2	2	3	17	1	2	Excellent	YES limited a lot,	Yes limited a little	YES	YES	YES	YES	Extremely	All of The time
27	0	4	1	1	1	0	1	1	0	2	0	0	1	1	0	0	0	0	1	0	1	1	0	1	0	0	2	0	1	1	2	2	1	1	1	1	0	10	0	1	Very good	Yes limited a little	YES limited a lot,	NO	NO	NO	YES	Quite a bit	All of The time
27	0	4	1	1	2	1	1	1	1	3	1	0	1	1	1	0	0	0	0	0	1	1	0	1	0	0	2	0	1	0	2	3	2	3	1	3	0	15	1	2	Excellent	NO, not limited at all	Yes limited a little	NO	NO	NO	NO	Quite a bit	Most of the time
22	0	4	1	0	0	0	1	1	1	1	0	0	1	1	1	1	0	0	0	0	1	1	0	1	2	1	2	1	1	1	1	0	2	2	0	0	1	9	0	0	Excellent	NO, not limited at all	NO, not limited at all	NO	NO	NO	NO	Not at all	All of The time
27	0	4	1	0	0	0	1	1	1	1	0	1	0	1	1	0	0	0	0	0	1	1	0	1	ابها	1	2	0	1	1	0	0	0	1	0	1	0	4	0	0	Excellent	Yes limited a little	Yes limited a little	NO	YES	NO	YES	Moderately	Most of the time
21	0	4	1	1	2	1	1	1	1	1	0	0	1	0	1	0	0	0	0	0	1	1	0	1	2	1	0	0	0	0	0	0	0	0	0	0	0	0	0	0	Excellent	YES limited a lot,	Yes limited a little	YES	NO	YES	YES	Moderately	All of The time
22	0	4	1	1	2	1	0	0	1	1	0	1	0	0	1	1	0	0	0	0	1	1	0	1	0	0	2	3	0	0	3	1	0	3	1	2	2	15	1	2	Fair	YES limited a lot,	Yes limited a little	NO	NO	YES	YES	Moderately	Most of the time, A good bit of the time
22	0	4	1	1	2	1	0	0	1	1	0	1	0	0	1	1	0	0	0	0	1	1	0	1	0	0	2	3	0	0	3	1	0	3	1	2	2	15	1	2	Fair	YES limited a lot,	Yes limited a little	NO	NO	YES	YES	Moderately	Most of the time, A good bit of the time
35	1	3	0	1	0	0	1	1	1	5	1	0	1	1	1	0	0	0	0	0	1	1	0	1	0	0	0	0	0	2	2	1	2	2	0	1	0	10	0	1	Good	NO, not limited at all	NO, not limited at all	NO	YES	YES	YES	Moderately	None of the time
27	0	4	1	0	2	1	1	1	1	2	0	1	1	1	1	0	0	0	0	0	1	1	0	1	0	0	0	1	0	2	1	1	1	3	1	0	0	10	0	1	Very good	NO, not limited at all	Yes limited a little	NO	NO	YES	YES	Moderately	Most of the time
30	0	4	1	0	0	0	1	1	1	5	1	0	1	1	1	1	0	0	0	0	1	1	0	1	0	0	1	1	0	2	2	2	3	0	1	1	0	12	0	1	Excellent	Yes limited a little	Yes limited a little	YES	YES	YES	YES	Moderately	A good bit of the time
18	0	3	0	1	0	0	1	1	1	1	0	0	1	0	0	0	0	0	0	0	1	1	0	1	0	0	0	0	0	2	1	1	0	0	0	0	0	4	0	0	Good	Yes limited a little	YES limited a lot,	YES	NO	YES	YES	Moderately	A little of the time
24	0	3	0	0	0	0	1	1	1	1	0	0	1	0	1	1	0	0	0	0	1	0	0	1	0	0	0	0	1	0	0	0	3	0	0	1	0	5	0	0	Fair	Yes limited a little	YES limited a lot,	YES	YES	YES	YES	Moderately	None of the time
25	0	4	1	0	1	0	1	1	1	2	0	0	1	0	0	0	0	0	0	0	1	1	0	1	3	1	0	0	0	2	2	1	2	0	0	0	0	7	0	0	Fair	Yes limited a little	YES limited a lot,	YES	YES	YES	YES	Moderately	None of the time
30	0	4	1	1	1	0	1	1	1	1	0	0	1	1	1	1	0	0	0	0	1	1	0	1	0	0	2	0	1	3	3	3	2	1	2	1	0	16	1	2	Good	Yes limited a little	Yes limited a little	YES	YES	YES	YES	Moderately	Most of the time
25	0	4	1	0	1	0	1	1	0	1	0	0	0	1	1	1	0	0	0	0	1	1	0	1	3	1	1	1	1	2	2	3	2	3	3	3	2	22	1	2	Very good	YES limited a lot,	YES limited a lot,	YES	NO	YES	NO	Moderately	A good bit of the time
25	0	3	0	1	0	0	1	0	1	2	0	0	1	1	1	1	0	0	0	0	1	1	0	1	2	1	0	1	1	1	2	2	3	2	1	1	0	14	1	2	Very good	YES limited a lot,	Yes limited a little	YES	YES	NO	NO	Moderately	Most of the time
25	0	3	0	1	0	0	1	0	1	2	0	0	1	1	1	1	0	0	0	0	1	1	0	1	2	1	0	1	1	1	2	2	3	2	1	1	0	14	1	2	Excellent	NO, not limited at all	NO, not limited at all	NO	YES	NO	YES	Quite a bit	Most of the time
45	1	3	0	0	2	1	1	1	1	6	1	1	1	1	1	1	1	0	0	0	1	0	0	1	1	1	0	2	2	3	2	2	3	3	3	2	0	22	1	2	Excellent	NO, not limited at all	Yes limited a little	NO	NO	NO	NO	Moderately	A good bit of the time
29	0	3	0	0	0	0	1	1	1	2	0	0	1	1	1	0	1	1	0	0	1	0	0	1	0	0	0	1	2	0	2	2	3	2	1	2	0	15	1	2	Good	Yes limited a little	YES limited a lot,	YES	YES	YES	NO	Quite a bit	All of The time
21	0	4	1	0	0	0	0	0	1	1	0	1	1	1	1	1	0	0	0	0	1	1	0	1	3	1	1	1	2	1	2	1	2	3	3	3	2	20	1	2	Very good	YES limited a lot,	YES limited a lot,	NO	NO	YES	YES	Not at all	All of The time
20	0	4	1	0	0	0	0	1	1	1	0	1	0	0	1	1	0	1	0	0	1	0	1	1	جيزان	1	2	1	2	3	3	3	1	3	2	3	1	22	1	2	Excellent	YES limited a lot,	Yes limited a little	NO	NO	NO	NO	Moderately	A little of the time
30	0	4	1	0	0	0	1	0	0	1	0	0	0	1	1	0	0	0	0	0	1	0	0	1	1	1	2	3	3	3	3	3	0	3	3	2	1	24	1	2	Good	NO, not limited at all	NO, not limited at all	NO	NO	NO	NO	Quite a bit	A good bit of the time
30	0	4	1	0	0	0	1	0	0	1	0	0	0	1	1	0	0	0	0	0	1	0	0	1	1	1	2	3	3	3	3	3	0	3	3	2	1	24	1	2	Very good	Yes limited a little	NO, not limited at all	NO	NO	YES	NO	Quite a bit	A good bit of the time
21	0	3	0	0	2	1	1	1	0	1	0	0	0	1	1	1	0	0	0	0	1	0	0	1	0	0	2	0	0	1	2	1	1	0	0	0	0	5	0	0	Excellent	YES limited a lot,	YES limited a lot,	NO	NO	YES	NO	Not at all	All of The time
30	0	4	1	0	2	1	1	1	0	3	1	0	0	1	1	0	0	0	0	0	1	1	0	1	ابها	1	2	2	2	2	3	2	3	2	3	1	0	20	1	2	Excellent	Yes limited a little	YES limited a lot,	YES	YES	YES	NO	Quite a bit	All of The time
28	0	4	1	0	1	0	1	1	1	1	0	0	1	1	1	1	0	0	0	0	1	1	0	1	مكه	1	0	1	1	2	0	0	0	0	0	0	0	4	0	0	Excellent	YES limited a lot,	YES limited a lot,	NO	NO	YES	NO	Not at all	All of The time
26	0	3	0	0	1	0	1	1	0	2	0	1	1	1	1	1	1	0	0	0	1	1	0	1	0	0	1	0	1	3	1	0	3	2	1	3	1	15	1	2	Good	Yes limited a little	Yes limited a little	YES	NO	YES	YES	Quite a bit	Most of the time
22	0	4	1	0	0	0	1	1	0	2	0	0	1	1	0	1	1	0	0	0	1	1	0	1	0	0	1	2	0	0	0	0	2	1	1	1	0	7	0	0	Very good	NO, not limited at all	Yes limited a little	NO	NO	NO	NO	Quite a bit	A good bit of the time
30	0	3	0	0	0	0	1	1	1	2	0	0	0	1	1	0	0	0	0	0	1	0	0	1	0	0	1	0	0	0	0	0	2	2	0	0	0	4	0	0	Fair	YES limited a lot,	YES limited a lot,	YES	YES	YES	NO	Not at all	All of The time
30	0	3	0	0	1	0	1	1	1	1	0	0	1	1	1	1	1	0	0	0	1	1	0	1	0	0	0	0	0	1	2	0	1	0	0	0	0	4	0	0	Fair	NO, not limited at all	Yes limited a little	YES	YES	YES	YES	Moderately	A good bit of the time
29	0	4	1	1	1	0	1	1	1	2	0	0	1	1	1	0	0	0	0	0	1	1	0	1	0	0	1	0	0	1	0	1	2	1	0	0	0	5	0	0	Very good	Yes limited a little	Yes limited a little	YES	YES	YES	YES	Moderately	A good bit of the time
27	0	4	1	1	1	0	1	1	1	3	1	0	1	1	1	0	0	0	0	0	1	1	0	1	1	0	2	0	0	1	2	1	1	1	1	1	0	8	0	0	Good	Yes limited a little	NO, not limited at all	YES	YES	YES	YES	Quite a bit	A good bit of the time
37	1	4	1	0	1	0	1	1	0	2	0	0	0	1	1	1	0	0	0	0	1	1	0	1	0	0	1	0	0	0	2	0	1	0	0	0	0	3	0	0	Excellent	NO, not limited at all	Yes limited a little	NO	YES	YES	YES	Quite a bit	All of The time
24	0	4	1	0	0	0	1	1	1	1	0	0	1	0	1	0	0	0	0	0	1	1	0	1	المدينة المنورة	1	2	0	1	3	1	0	3	0	0	0	0	8	0	0	Very good	NO, not limited at all	NO, not limited at all	YES	NO	NO	NO	Quite a bit	Most of the time
29	0	3	0	1	1	0	1	1	1	1	0	0	1	0	0	1	0	0	0	0	1	1	0	1	0	0	0	0	0	1	1	1	1	1	0	0	0	5	0	0	Good	Yes limited a little	NO, not limited at all	NO	YES	NO	YES	Moderately	All of The time
24	0	4	1	0	0	0	1	1	1	1	0	0	1	0	1	0	0	0	0	0	1	1	0	1	المدينة المنورة	1	2	0	1	3	1	0	3	0	0	0	0	8	0	0	Fair	YES limited a lot,	YES limited a lot,	YES	YES	YES	YES	Extremely	A good bit of the time, A little of the time
50	1	2	0	0	0	0	1	0	1	8	1	0	1	1	1	0	0	0	0	0	1	1	0	1	2	1	0	0	0	3	2	1	2	2	1	2	0	13	1	2	Very good	YES limited a lot,	YES limited a lot,	YES	YES	YES	NO	Quite a bit	All of The time, Most of the time
42	1	4	1	1	2	1	1	1	1	1	0	0	1	1	1	0	0	0	0	0	1	1	0	1	0	0	0	0	0	1	1	1	3	0	0	1	0	7	0	0	Very good	YES limited a lot,	YES limited a lot,	YES	YES	YES	NO	Quite a bit	All of The time, Most of the time
27	0	4	1	0	1	0	1	1	0	1	0	1	1	0	1	0	0	0	0	0	1	1	0	1	3	1	0	0	0	3	2	2	1	1	3	2	0	14	1	2	Very good	YES limited a lot,	Yes limited a little	YES	YES	YES	YES	Quite a bit	All of The time
32	1	4	1	1	2	1	1	1	1	2	0	1	0	1	1	0	1	0	1	1	1	1	0	1	2	1	2	1	1	1	2	2	2	2	1	1	0	13	1	2	Very good	NO, not limited at all	NO, not limited at all	YES	YES	NO	YES	Moderately	Most of the time
35	1	3	0	0	0	0	1	1	1	4	1	0	1	1	1	0	0	0	0	0	1	1	0	1	0	0	1	1	1	3	2	2	2	1	1	1	0	14	1	2	Very good	YES limited a lot,	YES limited a lot,	YES	YES	YES	YES	Quite a bit	Most of the time
36	1	3	0	0	1	0	1	1	1	5	1	0	1	1	1	0	0	1	1	0	0	1	0	1	0	0	0	0	1	3	2	3	3	2	1	1	0	16	1	2	Good	YES limited a lot,	YES limited a lot,	YES	YES	YES	YES	Extremely	All of The time
34	1	4	1	0	0	0	0	0	1	3	1	0	1	1	0	1	0	0	0	0	1	1	0	0	0	0	2	0	0	0	0	0	2	1	0	3	0	6	0	0	Excellent	NO, not limited at all	Yes limited a little	YES	NO	YES	NO	Not at all	All of The time
29	0	4	1	0	1	0	1	0	1	2	0	0	1	0	1	1	0	0	0	0	1	1	0	1	0	0	2	0	2	0	0	0	1	0	0	0	0	3	0	0	Excellent	Yes limited a little	YES limited a lot,	YES	NO	NO	NO	Extremely	All of The time
37	1	4	1	0	0	0	1	1	0	1	0	1	0	0	1	1	0	0	0	0	1	1	0	1	الخبر	1	2	1	1	3	2	2	2	2	1	1	0	15	1	2	Very good	YES limited a lot,	YES limited a lot,	YES	YES	YES	NO	Quite a bit	A good bit of the time
30	0	4	1	1	2	1	1	1	1	2	0	1	1	0	1	0	0	0	0	0	1	1	0	1	1	1	0	2	3	2	3	2	3	3	2	3	0	23	1	2	Very good	NO, not limited at all	NO, not limited at all	NO	NO	YES	YES	Moderately	Most of the time
24	0	4	1	1	2	1	1	1	1	1	0	0	1	1	1	0	0	0	0	0	1	1	0	1	0	0	1	0	0	3	2	2	3	1	1	1	0	13	1	2	Very good	YES limited a lot,	YES limited a lot,	YES	YES	YES	NO	Quite a bit	All of The time, Most of the time
24	0	4	1	1	2	1	1	1	1	1	0	0	1	1	1	0	0	0	0	0	1	1	0	1	0	0	1	0	0	3	2	2	3	1	1	1	0	13	1	2	Very good	YES limited a lot,	YES limited a lot,	YES	YES	YES	NO	Quite a bit	All of The time, Most of the time
21	0	4	1	0	2	1	1	1	1	1	0	1	1	1	1	1	1	0	0	1	1	1	0	1	0	0	2	0	0	3	2	1	3	1	0	2	0	12	0	2	Very good	YES limited a lot,	Yes limited a little	YES	YES	YES	YES	Quite a bit	All of The time
28	0	4	1	0	0	0	1	1	1	2	0	0	1	1	0	0	0	0	0	0	1	1	0	1	0	0	0	1	1	1	1	1	1	0	1	1	0	8	0	0	Very good	NO, not limited at all	NO, not limited at all	YES	YES	NO	YES	Moderately	Most of the time
26	0	4	1	1	1	0	1	1	0	1	0	1	1	1	1	0	0	0	0	0	1	1	0	1	0	0	0	3	0	3	1	2	3	1	1	2	0	16	1	2	Very good	YES limited a lot,	YES limited a lot,	YES	YES	YES	YES	Quite a bit	Most of the time
39	1	3	0	0	0	0	1	0	1	5	1	1	0	1	1	0	1	0	1	0	1	1	1	1	مكه	1	2	3	3	1	2	3	3	1	1	3	3	23	1	2	Good	YES limited a lot,	YES limited a lot,	YES	YES	YES	YES	Extremely	All of The time
33	1	4	1	1	2	1	1	1	1	1	0	0	1	0	0	1	0	0	0	0	1	1	0	1	0	0	2	0	0	0	0	0	2	0	3	3	3	11	0	1	Excellent	NO, not limited at all	Yes limited a little	YES	NO	YES	NO	Not at all	All of The time
33	1	4	1	1	2	1	1	1	1	1	0	0	0	1	1	1	1	0	0	1	1	1	0	1	القصيم	1	2	1	1	2	2	3	2	1	1	1	0	14	1	2	Excellent	Yes limited a little	YES limited a lot,	YES	NO	NO	NO	Extremely	All of The time
40	1	4	1	0	0	0	1	1	1	3	1	0	1	0	1	0	1	1	0	0	1	1	0	1	3	1	0	1	1	1	3	3	2	3	3	3	0	20	1	2	Very good	YES limited a lot,	YES limited a lot,	YES	YES	YES	NO	Quite a bit	A good bit of the time
34	1	4	1	0	1	0	1	0	1	3	1	1	1	1	1	1	0	0	0	0	1	0	0	1	0	0	2	1	1	2	2	1	2	1	1	1	0	12	0	1	Very good	NO, not limited at all	NO, not limited at all	NO	NO	YES	YES	Moderately	Most of the time
31.4506
6.61375
50
18
[truncated: 7 more columns]
